# Supplementary material for: Potentiometric MIP-Modified Screen-Printed Cell for Phenoxy Herbicides Detection
Source: MDPI journal article supplement (doi:10.3390/ijerph192416488), 2022-12-08
Supplement: s1 [file s1]

## Supplementary materials

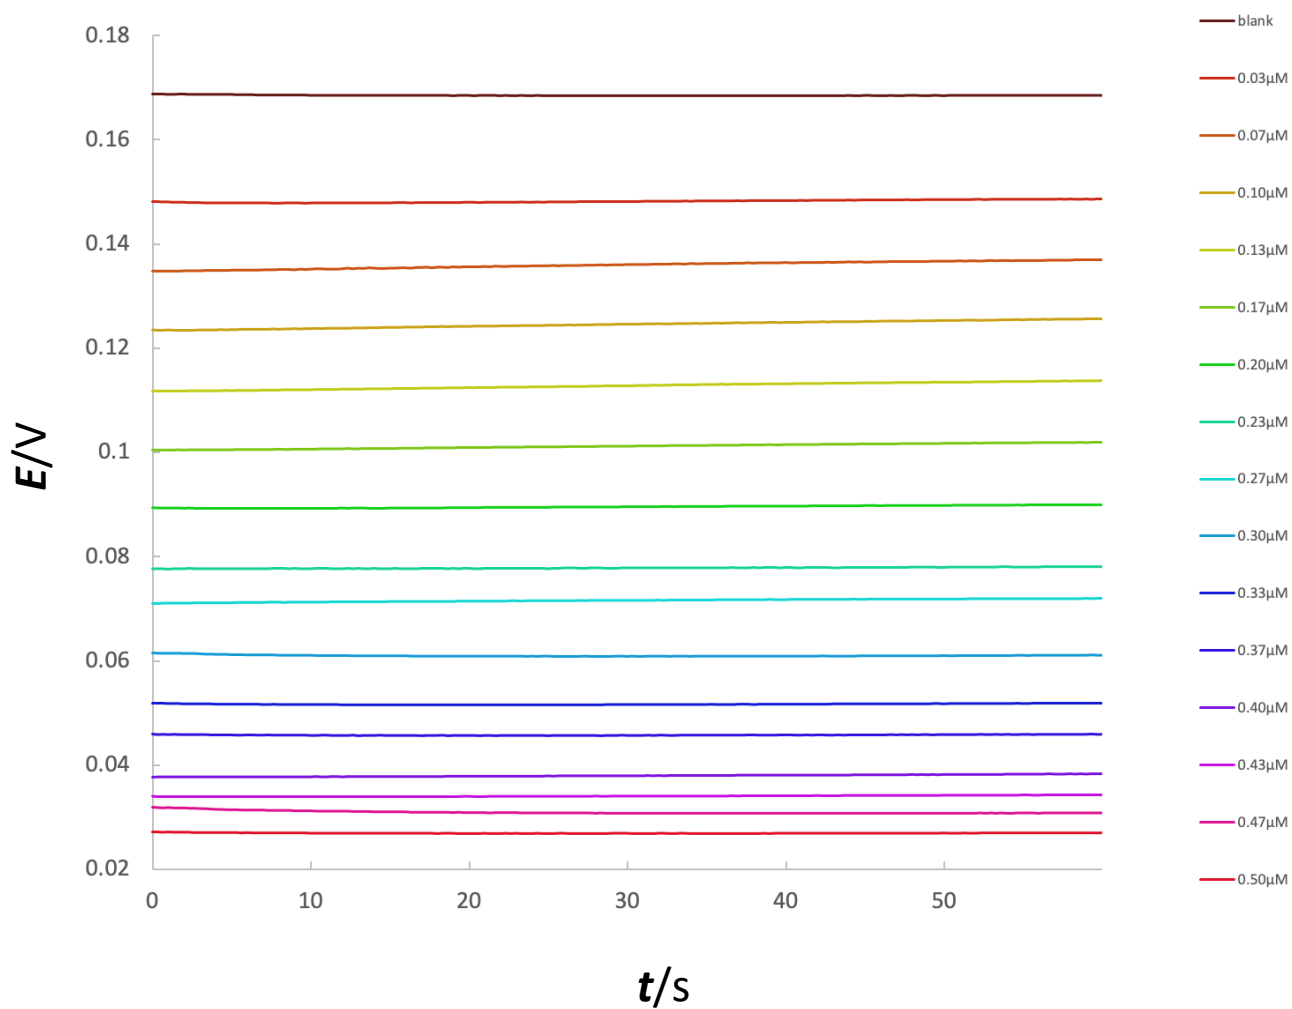

**Figure S1.** Potentiometric response of a MIP-based screen-printed cell at different MCPA concentrations in PBS buffer at pH = 5.5. Steady-state reached in 3 min. Cell potential registered in the last 60 s.

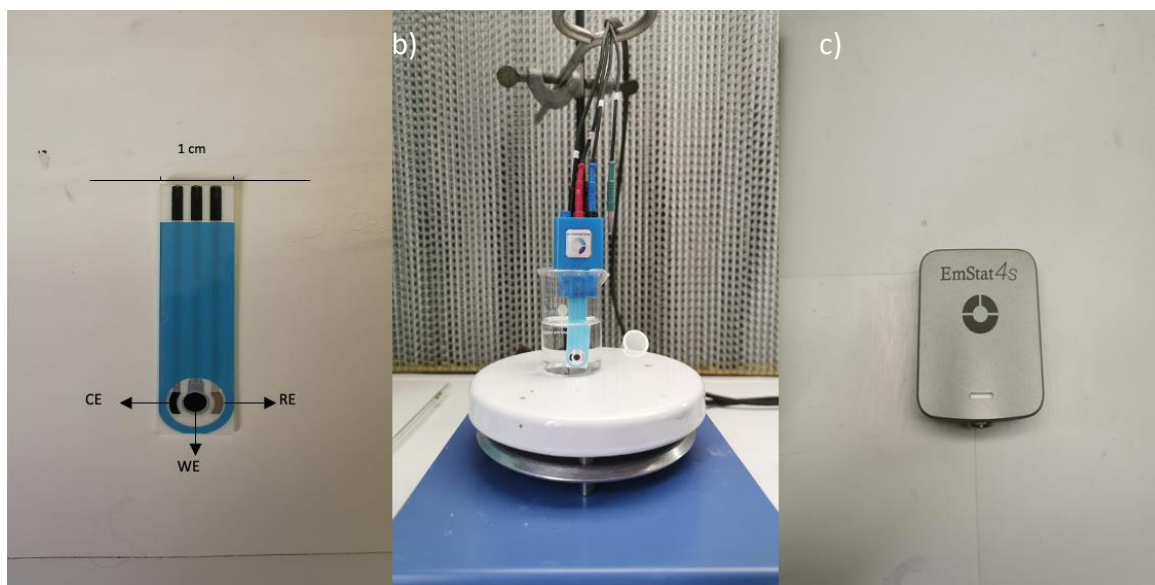

**Figure S2.** a) Screen Printed Cell; b) Experimental set-up: the electrode is dipped in the buffer solution and connected to c) EmStat 4s for potential acquisition.

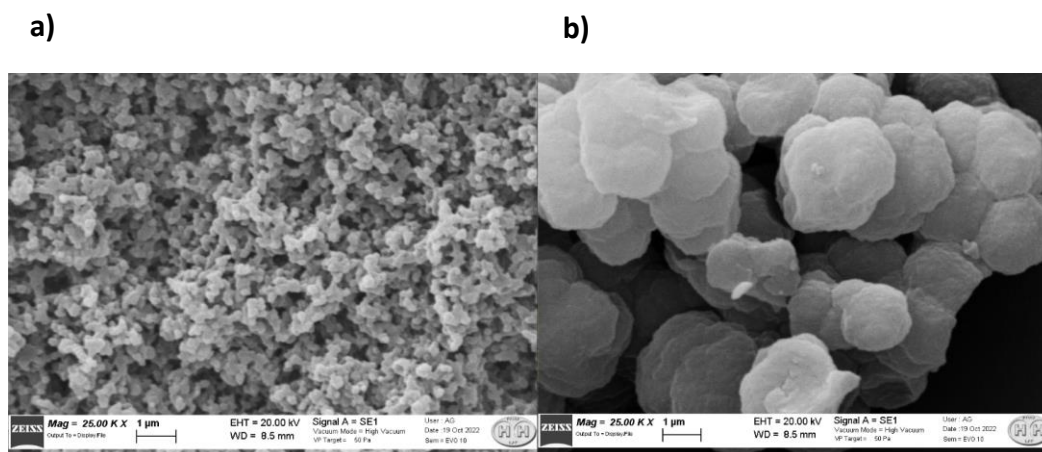

**Figure S3.** SEM images of (a) MCPA molecularly imprinted polymer and (b) not-imprinted polymer at the same magnification

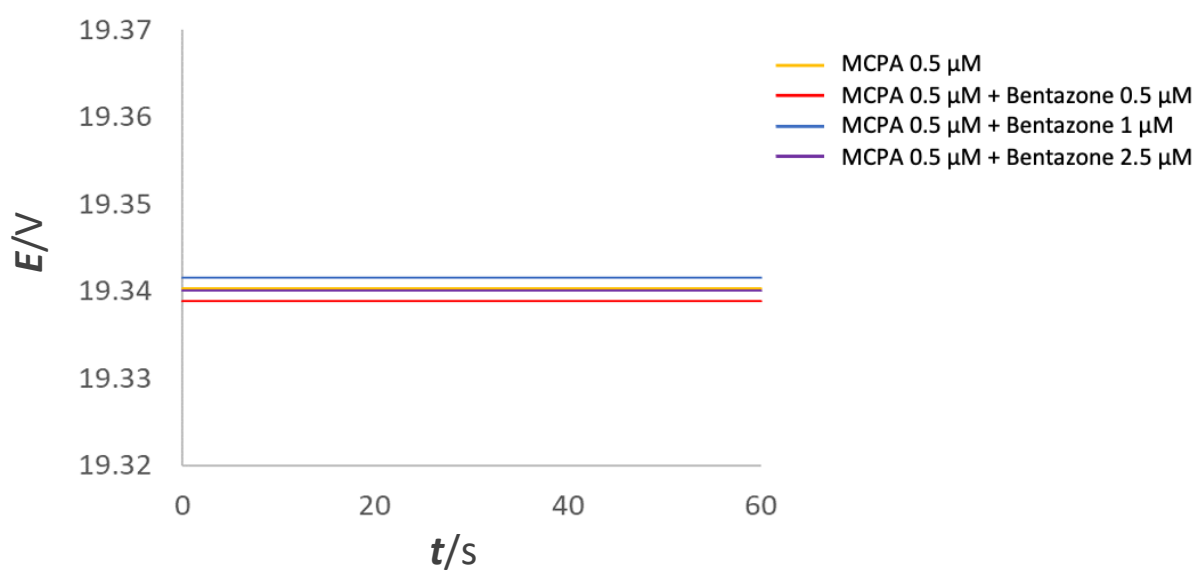

**Figure S4.** Potentiometric response of the MIP-modified electrode in MCPA 0.5  $\mu\text{mol L}^{-1}$  solution after the addition of Bentazone of 0.5  $\mu\text{mol L}^{-1}$ , 1.0  $\mu\text{mol L}^{-1}$  and 2.5  $\mu\text{mol L}^{-1}$ .
